# Supplementary material for: Highly monodisperse beta-cyclodextrin-covellite nanoparticles for efficient photothermal and chemotherapy
Source: Royal Society of Chemistry journal article supplement (doi:10.1039/c8nh00026c), 2018-01-01
Supplement: c8nh00026c1.pdf [file c8nh00026c1.pdf]

Electronic Supplementary Information (ESI)

## Highly Monodisperse Beta-Cyclodextrin-Covellite Nanoparticles for Efficient Photothermal and Chemotherapy

Feng Lu,<sup>a,b</sup> Jinfeng Wang,<sup>a</sup> Chao Tao<sup>\*c</sup> and Jun-Jie Zhu<sup>\*a</sup>

<sup>a</sup>State Key Laboratory of Analytical Chemistry for Life Science, School of Chemistry and Chemical Engineering, Nanjing University, Nanjing 210023, China. E-mail: jjzhu@nju.edu.cn

<sup>b</sup>Key Laboratory for Organic Electronics and Information Displays & Jiangsu Key Laboratory for Biosensors, Institute of Advanced Materials (IAM), Jiangsu National Synergetic Innovation Center for Advanced Materials (SICAM), Nanjing University of Posts & Telecommunications, Nanjing 210023, China.

<sup>c</sup>MOE Key Laboratory of Modern Acoustics, Department of Physics, Nanjing University, Nanjing, 210093, China. E-mail: taochao@nju.edu.cn

### Experimental section

**1. Chemicals:** sulfur powder, ethanol, chloroform, tetrahydrofuran, ascorbic acid and sodium borohydride were purchased from Nanjing Chemical Reagent Co., Ltd. Sodium hydroxide (NaOH), 1-octadecene, oleic acid, Poly(isobutylene-alt-maleic anhydride) (Mw~6000 Da), dodecylamine and oleylamine were obtained from Sigma-Aldrich. Gold nanorods (Au NRs) were synthesized according to a previous reported method<sup>[1]</sup> and dispersed in 1 mM CTAB solution to avoid the aggregation under laser irradiation. Calcein AM, Propidium Iodide (PI) and 3-(4,5-dimethylthiazol-2-yl)-2,5-diphenyltetrazolium bromide (MTT) were purchased from KeyGEN BioTECH. Doxorubicin hydrochloride (DOX) was purchased from Sangon Biotech. 6-Deoxy-6-aminoethylamino- $\beta$ -cyclodextrin ( $\beta$ -CD-NH<sub>2</sub>) was purchased from Shandong Binzhou Zhiyuan Bio-Technology Co., Ltd. Copper acetylacetonate (Cu(acac)<sub>2</sub>), Iron (III) acetylacetonate (Fe(acac)<sub>3</sub>), Sodium oleate, 1-ethyl-3-(3-dimethylaminopropyl)carbodiimide (EDC) and N-hydroxysulfosuccinimide sodium salt (NHS) were supplied by Aladdin Industrial Inc. Cyclo(Arg-Gly-Asp-D-Phe-Lys) peptide (c(RGDfK)) conjugated with adamantane (denoted as Ad-RGD; purity: 98%) was purchased from ChinaPeptides Co., Ltd. All the chemicals were used as received

without further purification. Millipore water (18.2 M $\Omega$  cm at 25 °C) was used throughout all experiments.

**2. Characterization:** Transmission electron microscopy (TEM) images were obtained using a JEOL JEM 1011 electron microscope at an acceleration voltage of 100 kV. UV-Vis spectra were recorded with a UV-3600 spectrophotometer (Shimadzu). X-ray powder diffraction (XRD) measurement was performed on a Shimadzu XRD-6000 with Cu K $\alpha$  radiation ( $\lambda$  = 0.15418 nm) with a scanning rate of 2 deg/min. The photoacoustic imaging was obtained with a reported setup equipped with a 1064 nm nanosecond pulsed laser.<sup>[2]</sup> The fluorescence spectra were measured with a RF-5301PC fluorescence spectrometer. Zeta potentials were measured on a Malven Nano-Z instrument. Confocal laser scanning microscopy (CLSM) images were obtained using a Leica TCS SP5 microscope. Elemental composition of the copper sulfide nanoparticles was determined by an energy dispersive X-ray spectroscopy (EDX) system attached to a Hitachi S-4800 field emission scanning electron microscope. Hydrodynamic diameters were obtained through dynamic light scattering (DLS) with a 90 Plus Particle Size Analyzer (Brookhaven Instruments Corp.). FTIR spectra were recorded on a Nicolet 6700 spectrograph. The concentration of nanoparticles was all determined using absorption spectra with a mass extinction coefficient  $\sim$  60 L g<sup>-1</sup>cm<sup>-1</sup>.

**3. Synthesis of covellite (CuS) nanoparticles:** In a typical procedure, 0.25 mmol Cu(acac)<sub>2</sub> was dissolved in 5 mL of oleylamine and 10 mL of 1-Octadecene at 55 °C under nitrogen flow, forming a green transparent solution. The sulfide precursor was prepared by dissolving 1 mmol sulfur powder in 10 mL of oleic acid at 130 °C for 30 minutes under nitrogen atmosphere. After cooling down to 55 °C, 5 mL of the sulfide precursor was added into the Cu(acac)<sub>2</sub> solution, and then the mixture was heated to 120 °C and maintained at this temperature for 1 hour forming a dark green solution. After cooling down to the room temperature, the resulting CuS nanoparticles (CuS-OA) were precipitated with ethanol and washed with chloroform/ethanol, carbon

disulfide/ethanol and ethanol several times, and then re-dispersed in 5 mL chloroform and stored at 4 °C for further modifications.

**4. Synthesis of amphiphilic polymer:** the amphiphilic polymer with 75% of its anhydride rings reacted with dodecylamine was synthesized according to the previous report.<sup>[3]</sup> Briefly, 1.542 g (10 mmol monomer) of poly(isobutylene-alt-maleic anhydride) were placed in a round flask. Then, 7.5 mmol dodecylamine dissolved in 50 mL of anhydrous THF were added and stirred at 60 °C for 3 hours. After concentrate the reaction mixture roughly to one fifth of the original volume by a rotavapor, the concentrated solution was further stirred at 60 °C overnight. Finally, the obtained polymer was dried and re-dissolved in chloroform, the volume was adjusted to around 12.5 mL, yield a monomer concentration of 0.8 M.

**5. Synthesis of Polymer coated CuS NPs (CuS-COOH):** 2 mL CuS nanoparticles solution (~ 4 mg/mL), 136  $\mu$ L of amphiphilic polymer stock solution and 3 mL of  $\text{CHCl}_3$  were mixed together and stirred for 20 minutes. The solvent was removed by rotary evaporation of yield a green CuS-polymer film. 6 mL of NaOH aqueous solution (0.1 M) was added and the solution was sonicated to obtain colloidal stable polymer grafted CuS NPs with abundant carboxyl groups (CuS-COOH). 8mL water was added thereafter to dilute the solution. The CuS solution was passed through a 0.22  $\mu$ m syringe filter and purified by ultracentrifugal filtration for 3 times. The obtained solution was further dialysis against PBS for 2 days.

**6. Synthesis of  $\beta$ -cyclodextrin conjugated CuS nanoparticles (CuS-CD):** CuS-COOH in 5 mL PBS (0.4 mg/mL) was mixed with 9 mg  $\beta$ -CD-NH<sub>2</sub> dissolved in 1 mL PBS, 2.8 mg EDC in 0.5 mL PBS and 7 mg NHS in 0.5 mL PBS was added later. The reaction was continued for 4 hours, and then the mixture was ultracentrifuged 3 times and dialysis against PBS for 24 hours. The final volume was adjusted to 5 mL.

**7. Synthesis of RGD modified CuS nanoparticles (CuS-RGD):** 3 mL of CuS-CD in PBS was mixed with 0.6 mL of 2 mg/mL Ad-RGD and stirred for 10 h. After that the

solution was ultracentrifuged 3 times and dialysis for 24 h. The final product was adjusted to 3 mL in volume.

**8. DOX loading on CuS-RGD nanoparticles (CuS-DOX):** 1.5 mL of CuS-RGD was mixed with 0.1 mg DOX in 100  $\mu$ L DI water and stirred for 12 h. After purification the obtained nanoparticles were dispersed in 1.5 mL PBS.

**9. Measurement of the photothermal performance:** An aqueous solution of CuS nanoparticles (300  $\mu$ L) with different concentrations was added into a 96-well plate. Stabilized infrared fiber laser (980 nm or 808 nm) with a beam diameter of around 6 mm (LEO Photonics) were used to irradiate the nanoparticle dispersions. The temperature of the solution was measured with a TM902C thermodetector.

**10. *In Vitro* photothermal ablation of cancer cells:** HeLa cells (350,000 cells) were seeded onto a confocal dish (35 mm) at 37 °C with 5% CO<sub>2</sub> in complete medium one day before the treatment. Then, cells were washed with PBS and incubated with nanoparticles with a concentration of 10  $\mu$ g/mL for 4 hours. A 980 nm laser with a power density of 1.5 W/cm<sup>2</sup> were used to irradiate the cells. After 4 minutes exposure, the nanoparticles were removed and cells were further incubated for 12 h. The cells were then washed with PBS and stained with calcein AM and PI for CLSM imaging.

**11. *In Vitro* drug release:** Buffers with different pHs were added into the drug loaded nanoparticles (CuS-DOX) to make the DOX concentration to be 5  $\mu$ g/mL. The emission intensity of DOX in the suspension at 555 nm was monitored to reflect the drug release amount.

**12. Intracellular drug release:** HeLa cells were seeded in a 35 mm confocal dish over night. Then the culture medium was removed and DOX loaded nanoparticles in fresh culture medium with a DOX concentration of 5  $\mu$ g/mL was added. After incubated for 2 h, the cells were washed with PBS and stained with Hoechst 33342 (2  $\mu$ g/mL) for 15 min at 37 °C. After three times wash with PBS, CLSM observation was carried out after wash away the excess Hoechst 33342.

**13. Cell Viability studies:** HeLa cells were seeded in 96-well plates ( $1 \times 10^5$  cells/well) and cultured for 24 h before experiment. Then, the media was removed and the cancer cells were incubated with nanoparticles with different concentrations for 3 hours. 980 nm laser with a power density of  $1.5 \text{ W/cm}^2$  was used to irradiate the cells (4 min each well). After wash with PBS, fresh culture medium was added and the cells were further cultured for 24 h. After this, a standard MTT assay was applied to determine the cell viabilities. Absorbance intensity at 490 nm was determined with Varioskan flash multimode reader (Thermo Scientific). At least three replicates were done for each group.

**Table S1.** Mass extinction coefficient of the established nanomaterials in the literature.

| Material                                       | Mass extinction coefficient | Wavelength |
|------------------------------------------------|-----------------------------|------------|
| Nano-rGO <sup>[4]</sup>                        | 21.1                        | 808 nm     |
| GO <sup>[4]</sup>                              | 5.94                        | 808 nm     |
| MoS <sub>2</sub> <sup>[4]</sup>                | 29.8                        | 808 nm     |
| WS <sub>2</sub> <sup>[4]</sup>                 | 23.8                        | 808 nm     |
| FeS <sup>[4]</sup>                             | 15.5                        | 808 nm     |
| MoSe <sub>2</sub> <sup>[5]</sup>               | 17.4                        | 785 nm     |
| TiS <sub>2</sub> <sup>[6]</sup>                | 26.8                        | 808 nm     |
| SnS <sup>[7]</sup>                             | 16.2                        | 808 nm     |
| Bi <sub>2</sub> S <sub>3</sub> <sup>[8]</sup>  | 20.5                        | 808 nm     |
| Au Nanorod <sup>[9]</sup>                      | 13.9                        | 808 nm     |
| Au Nanorod <sup>[10]</sup>                     | 20.0                        | 808 nm     |
| Cu <sub>9</sub> S <sub>5</sub> <sup>[11]</sup> | 7.2                         | 980 nm     |
| CuS <sup>[12]</sup>                            | 13.5                        | 1064 nm    |
| CuS <sup>[13]</sup>                            | 44.9                        | 930 nm     |
| This work                                      | 32.4                        | 808 nm     |
| This work                                      | 60.7                        | 965 nm     |

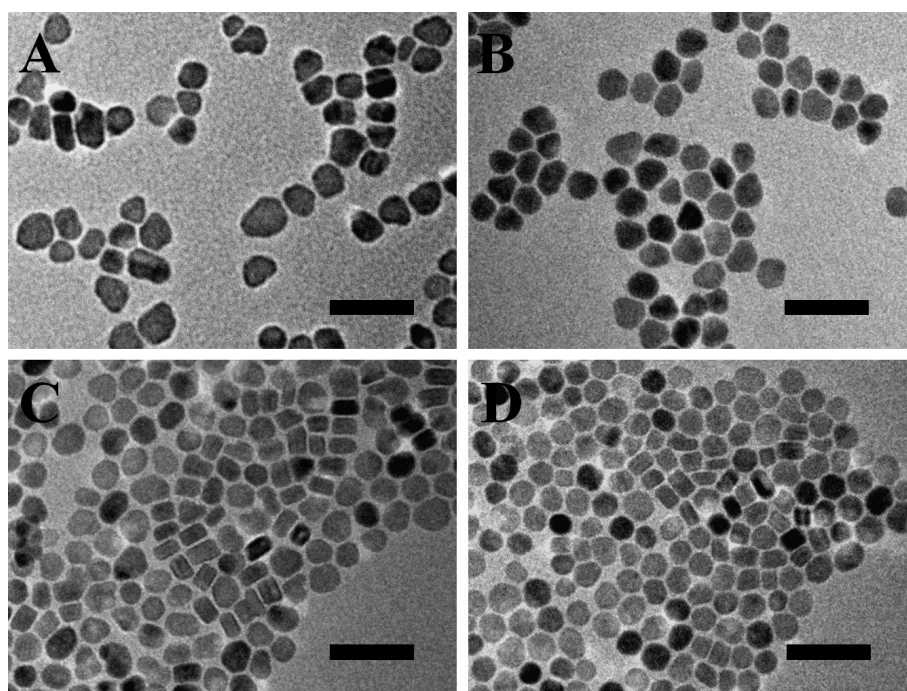

**Fig. S1** Enlarged TEM images of copper sulfide nanoparticles synthesized with different Cu:S ratios, 1:0.5 (A); 1:1 (B); 1:2 (C); 1:4 (D). The scale bar is 50 nm. The copper sulfide nanoparticles synthesized with low Cu:S ratios (1:2 and 1:4) were found to be thick plate-like particles with an average thickness of ~9 nm.

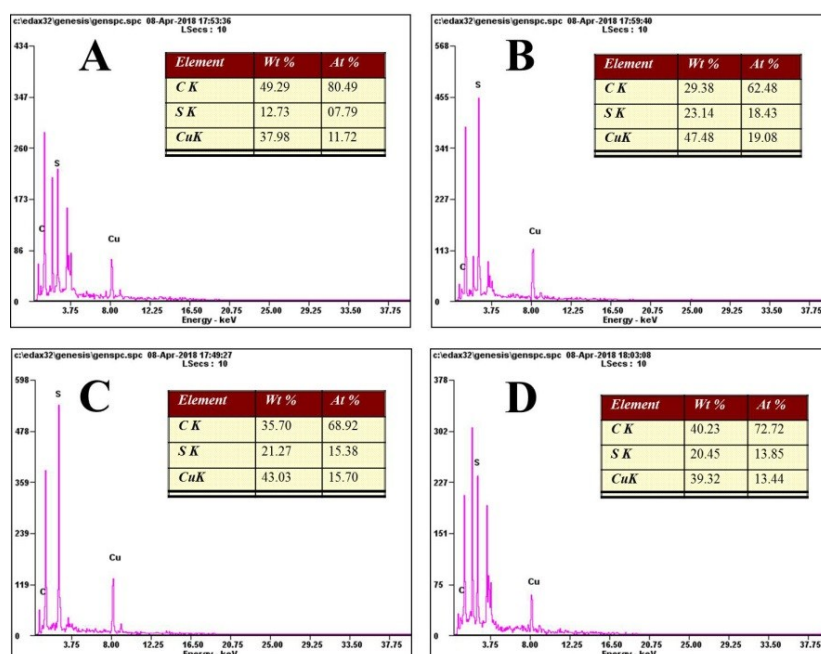

**Fig. S2** Energy dispersive X-ray spectroscopy (EDX) of copper sulfide nanoparticles synthesized with different Cu:S ratios, 1:0.5 (A); 1:1 (B); 1:2 (C); 1:4 (D). The actual ratios were found to be 1:0.66, 1:0.96, 1:0.98 and 1:1.03 for the nanoparticles prepared with Cu:S ratio of 1:0.5, 1:1, 1:2 and 1:4 respectively, which is in accord with the XRD results.

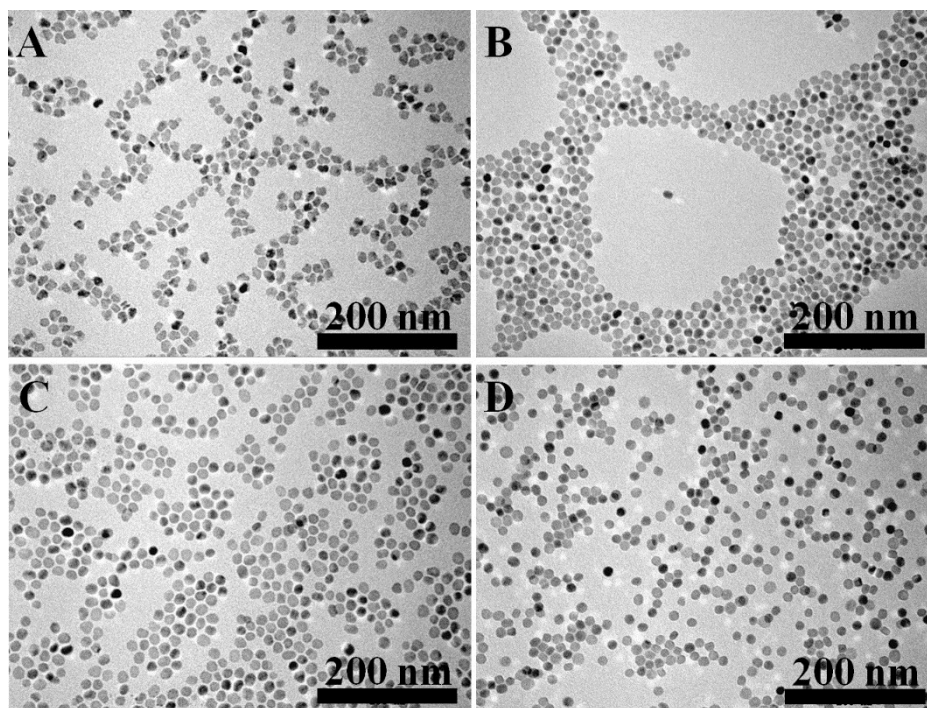

**Fig. S3** TEM images of copper sulfide nanoparticles synthesized at different temperatures, 80 °C (A); 100 °C (B); 120 °C (C); 140 °C (D).

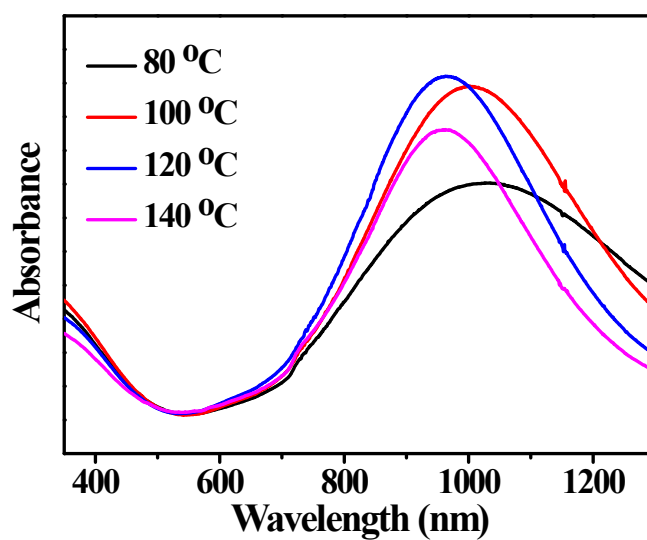

**Fig. S4** Absorption spectra of copper sulfide nanoparticles synthesized at different temperatures.



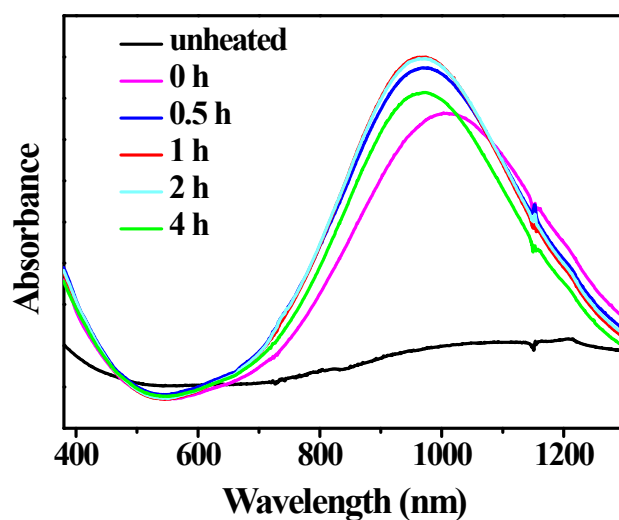

**Fig. S5** Absorption spectra of copper sulfide nanoparticles synthesized with different reaction times. For 0 h sample, heating was stopped immediately after the temperature reached 120 °C.

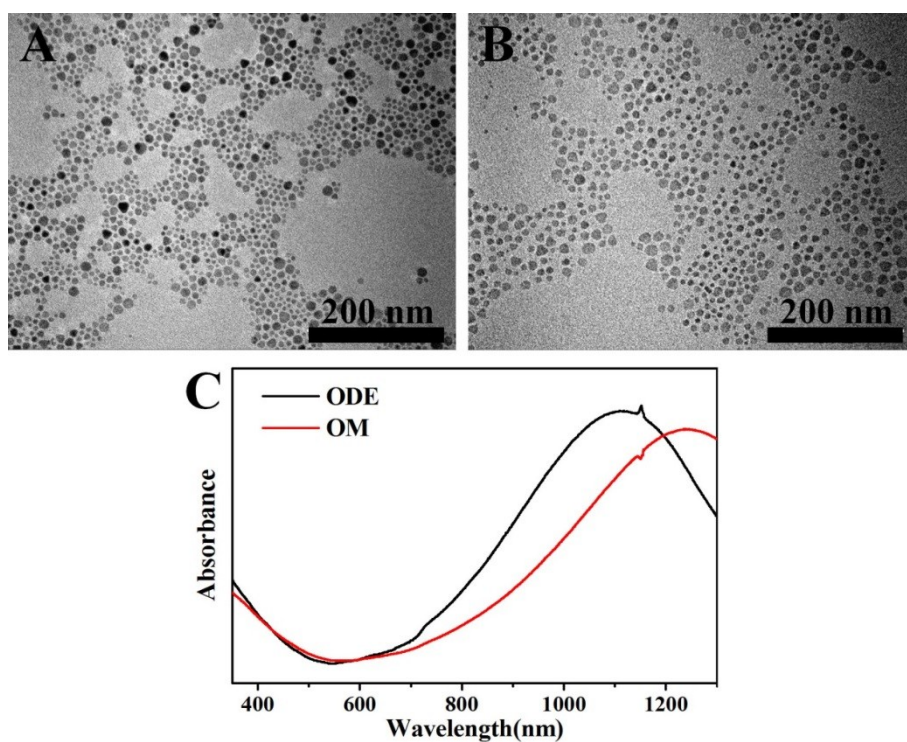

**Fig. S6** Copper sulfide nanoparticles prepared with different organo-sulfur precursors, sulfur powder in 1-octadecene (A) and sulfur powder in oleylamine (B), and their corresponding absorption spectra (C).



**Table S2.** Mass extinction coefficient of copper sulfide nanoparticles synthesized with different Cu:S ratios

| Cu:S ratio                                                     | 1:0.5 | 1:1  | 1:2  | 1:4  |
|----------------------------------------------------------------|-------|------|------|------|
| Mass Extinction Coefficient ( $\text{Lg}^{-1}\text{cm}^{-1}$ ) | 21.5  | 39.6 | 60.7 | 60.9 |

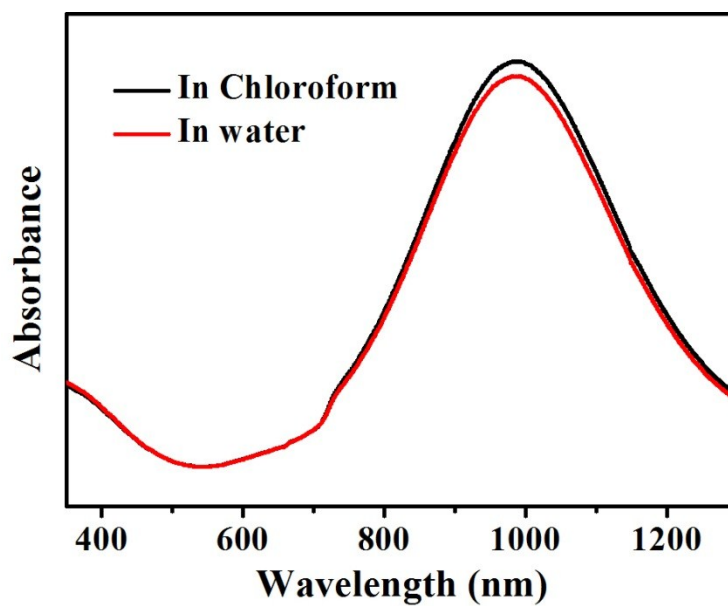

**Fig. S7** Absorption spectra of CuS nanoparticles before and after phase transfer. The spectra of CuS nanoparticles in water was acquired before purification.

**Table S3.** Zeta potential of CuS nanoparticles with different surface modifications.

| Sample   | Test 1 (mV) | Test 2 (mV) | Test 3 (mV) | Average (mV)     |
|----------|-------------|-------------|-------------|------------------|
| CuS-COOH | -32.1       | -34.2       | -29.6       | $-32 \pm 2.3$    |
| CuS-CD   | -20.4       | -21.4       | -20.1       | $-20.6 \pm 0.68$ |
| CuS-RGD  | -22         | -24.2       | -24.7       | $-23.6 \pm 1.4$  |
| CuS-DOX  | -15.2       | -15.3       | -16.3       | $-15.7 \pm 0.78$ |

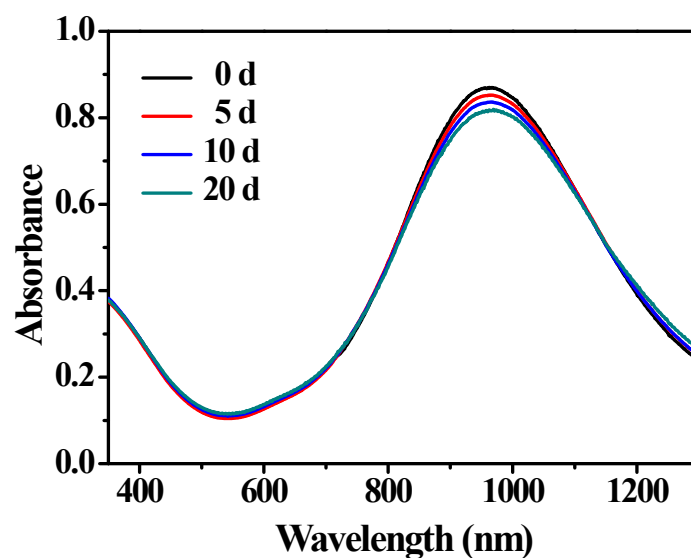

**Fig. S8** Absorption spectra of amphiphilic polymer modified covellite nanoparticles (CuS-COOH) stored for different period of times. The decrease of the absorbance was less than 8% over 20 days storage.

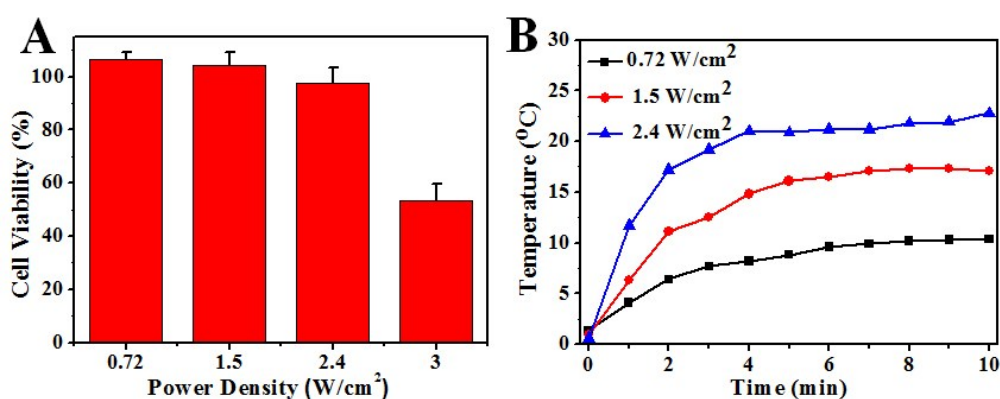

**Fig. S9** (A) Cell viabilities of HeLa cells irradiated with a 980 nm laser for 4 min at different power densities. (B) The temperature separation between CuS-COOH (16.7 ug/mL) and water irradiated with 980 nm laser with different power densities.

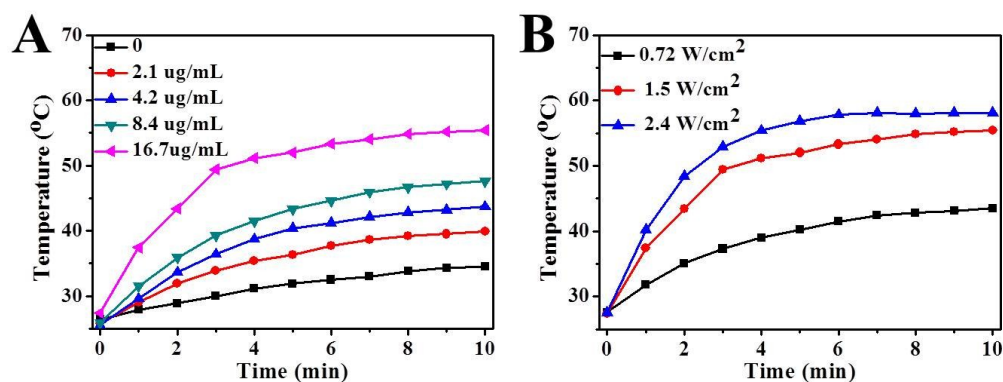

**Fig. S10** Temperature elevation of covellite nanoparticle solutions after irradiated with 808 nm NIR laser (1.5 W/cm²) with different concentrations (A) and laser power densities (B).

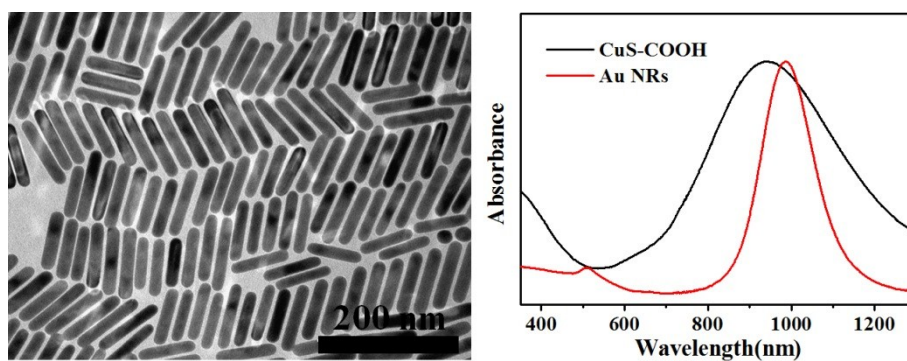

**Fig. S11** TEM image (left) of as-prepared Au NRs. The absorption spectra (right) of CuS nanoparticles and Au NRs.

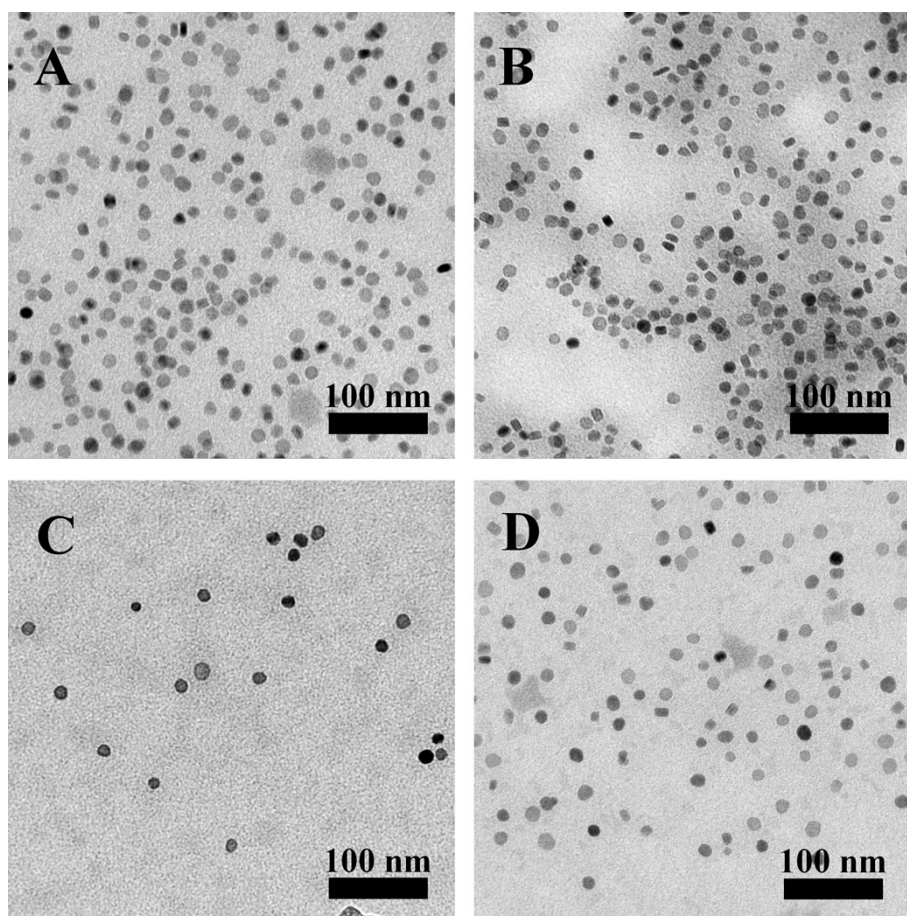

**Fig. S12** TEM images of copper sulfide nanoparticles with different surface modifications, CuS-COOH (A); CuS-CD (B); CuS-RGD (C); CuS-DOX (D). All the nanoparticles maintain their morphology and monodispersity during the modification process, no aggregation was formed.

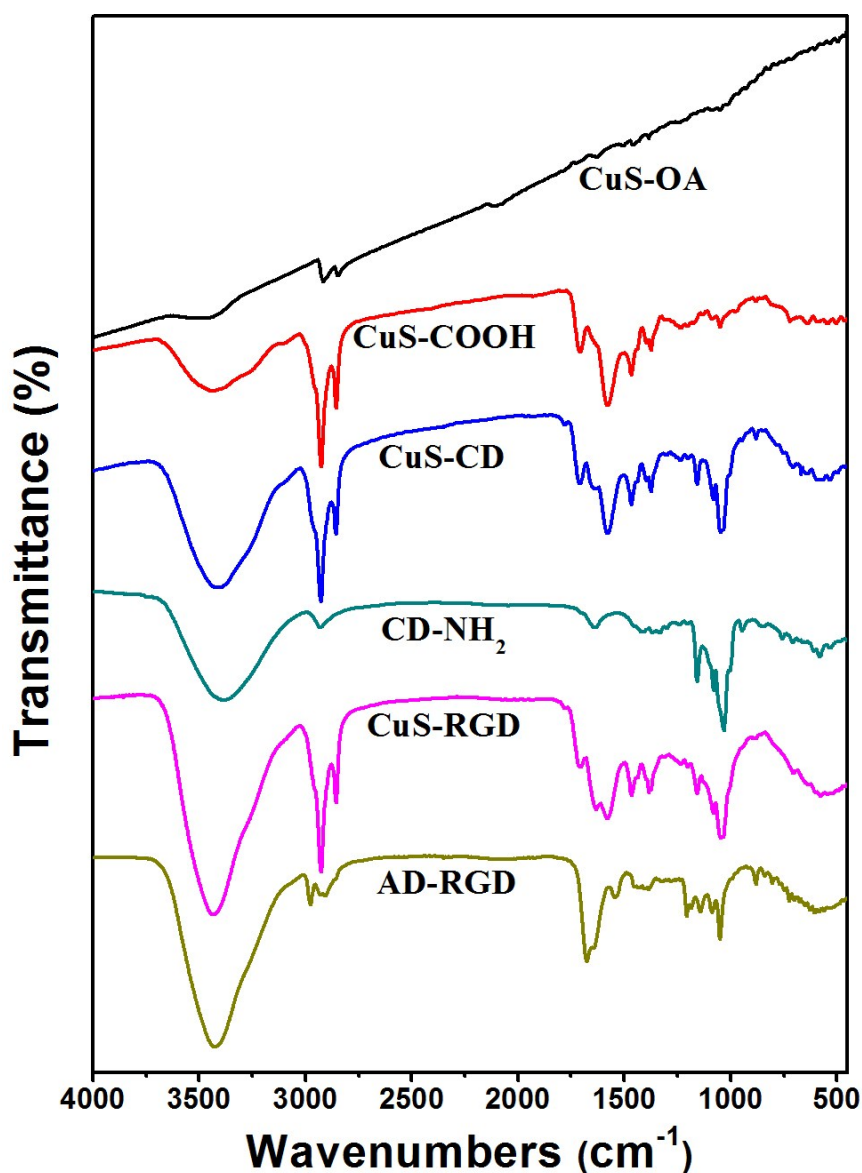

**Fig. S13** FTIR spectra of CuS nanoparticles with different surface modifications. Strong absorption peaks of CD-NH<sub>2</sub> at 1035, 1080 and 1155 cm<sup>-1</sup> appear for CuS-CD nanoparticles, which demonstrates the efficient conjugation of CD on CuS-COOH nanoparticles. After the modification of Ad-RGD, CuS-RGD nanoparticles exhibits a increased absorption band around 1635 cm<sup>-1</sup> arising from the amide I band in the peptide,<sup>[14]</sup> which proves the sucessful functionalization of RGD.

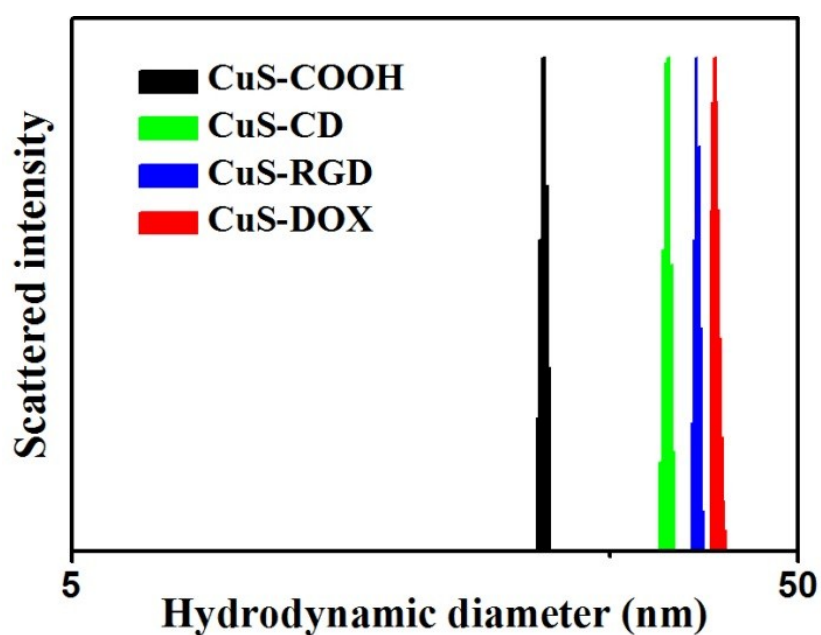

**Fig. S14** Hydrodynamic diameters of CuS nanoparticles during the modifications. The hydrodynamic diameters were found to be 22.7, 33.1, 36.2 and 38.2 nm for CuS-COOH, CuS-CD, CuS-RGD and CuS-DOX nanoparticles respectively. All of the nanoparticles exhibited excellent colloidal stability and narrow size distributions in aqueous solution. Note that the modification of beta-cyclodextrin is a crucial step, too many EDC can lead to the aggregation and even precipitation of the nanoparticles.



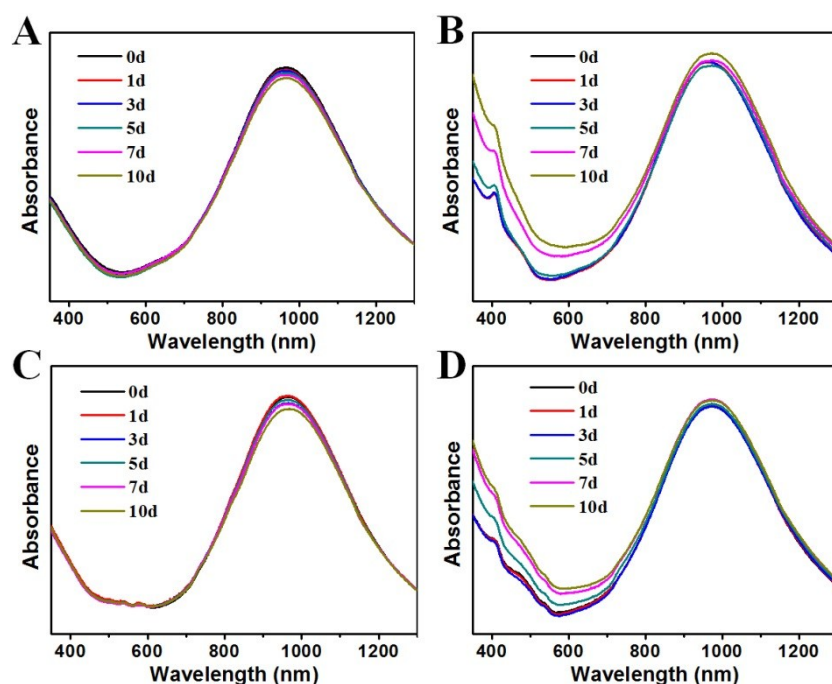

**Fig. S15** Absorption spectra of CuS-RGD and CuS-DOX stored in PBS and 10% fetal bovine serum (FBS) for different period of times, CuS-RGD in PBS(A); CuS-RGD in FBS (B); CuS-DOX in PBS (C); CuS-DOX in FBS (D). The decrease of the absorbance of the nanoparticles around 965 nm was less than 5% over 10 days storage in PBS. The absorbance of nanoparticles around 965 nm in FBS slightly decreased in the first 3-5 days, then become slight increased in 7-10 days accompanied by the obviously increased absorbance aournd 400 nm. Since the absorption around 400 nm comes from FBS, the increased absorbance may due to the metamorphism of FBS after long time storage. The remain of the absorbance of CuS nanoparticles indicates their good stability in physiological solutions, (i) CuS nanoparticles do not decompose in physiological solutions; (ii) CuS nanoparticles remain colloidal stable in physiological solutions.



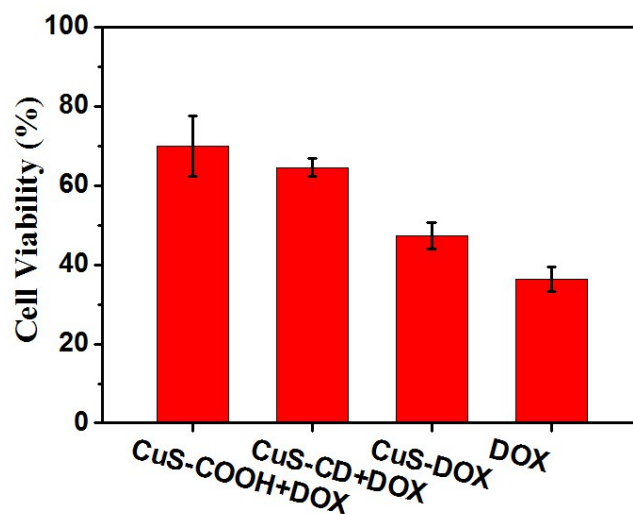

**Fig. S16** The Cell viabilities of free DOX and DOX loaded CuS nanoparticles at an equivalent DOX concentration of 2.5  $\mu\text{g/mL}$ . Higher cytotoxicity achieved with RGD modified CuS nanoparticles comparing with COOH and CD modified ones, indicates the positive effect on the therapeutic efficacy of target ligands. Free DOX shows highest cytotoxicity due their positive charge, however this property was not favored for *in vivo* applications.<sup>[15-17]</sup>

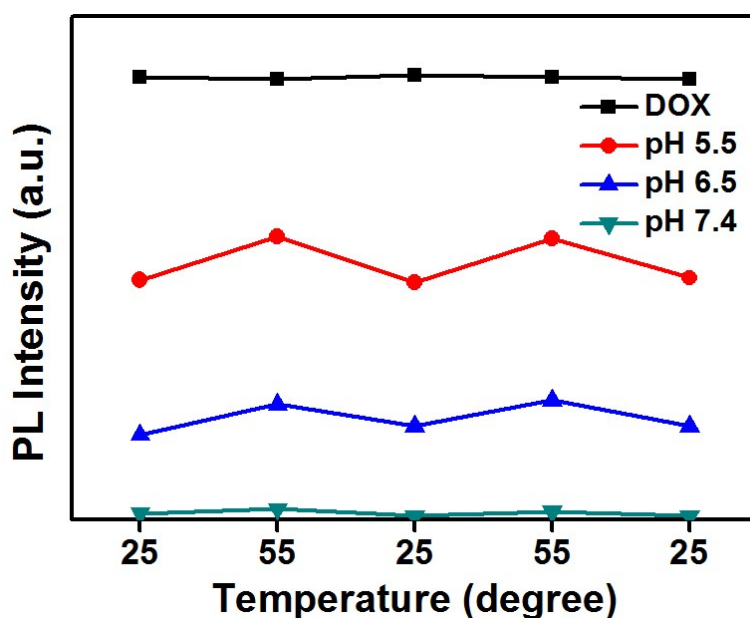

**Fig. S17** The influence of temperature on the emission intensity (550 nm) of free DOX (pH 7.4) and CuS-DOX nanoparticles at different pHs.

## Reference:

- [1] X. C. Ye, C. Zheng, J. Chen, Y. Z. Gao, C. B. Murray, *Nano Lett.* , 2013, **13**, 765-771.
- [2] X. Zhang, X. Q. Qian, C. Tao, X. J. Liu, *Ultrasound in Medicine and Biology*, 2018, **44**, 1110-1118.
- [3] C. A. J. Lin, R. A. Sperling, J. K. Li, T. Y. Yang, P. Y. Li, M. Zanella, W. H. Chang, W. G. J. Parak, *Small*, 2008, **4**, 334-341.
- [4] K. Yang, G. B. Yang, L. Chen, L. Cheng, L. Wang, C. C. Ge, Z. Liu, *Biomaterials*, 2015, **38**, 1-9.
- [5] L. H. Yuwen, J. J. Zhou, Y. Q. Zhang, Q. Zhang, J. Y. Shan, Z. M. Luo, L. X. Weng, Z. G. Teng, L. H. Wang, *Nanoscale*, 2016, **8**, 2720-2726.
- [6] X. X. Qian, S. D. Shen, T. Liu, L. Cheng, Z. Liu, *Nanoscale*, 2015, **7**, 6380-6387.
- [7] Q. L. Ren, B. Li, Z. Y. Peng, G. J. He, W. L. Zhang, G. Q. Guan, X. J. Huang, Z. Y. Xiao, L. J. Liao, Y. S. Pan, X. J. Yang, R. J. Zou, J. Q. Hu, *New J. Chem.* , 2016, **40**, 4464-4467.
- [8] Z. Y. Xiao, C. T. Xu, X. H. Jiang, W. L. Zhang, Y. X. Peng, R. J. Zou, X. J. Huang, Q. Liu, Z. Y. Qin, J. Q. Hu, *Nano Res*, 2016, **9**, 1934-1947.
- [9] J. T. Robinson, K. Welsher, S. M. Tabakman, S. P. Sherlock, H. L. Wang, R. Luong, H. J. Dai, *Nano Res*, 2010, **3**, 779-793.
- [10] Y. Lyu, C. Xie, S. A. Chechetka, E. Miyako, K. Y. Pu, *J. Am. Chem. Soc.* , 2016, **138**, 9049-9052.
- [11] Q. W. Tian, F. R. Jiang, R. J. Zou, Q. Liu, Z. G. Chen, M. F. Zhu, S. P. Yang, J. L. Wang, J. H. Wang, J. Q. Hu, *Acs Nano*, 2011, **5**, 9761-9771.
- [12] G. Ku, M. Zhou, S. L. Song, Q. Huang, J. Hazle, C. Li, *Acs Nano*, 2012, **6**, 7489-7496.
- [13] M. Zhou, R. Zhang, M. A. Huang, W. Lu, S. L. Song, M. P. Melancon, M. Tian, D. Liang, C. Li, *J. Am. Chem. Soc.* , 2010, **132**, 15351-15358.
- [14] C. Park, K. Lee, C. Kim, *Angew. Chem. Int. Ed.*, 2009, **48**, 1275-1278.
- [15] Q. Zhang, F. Liu, K. T. Nguyen, X. Ma, X. J. Wang, B. G. Xing, Y. L. Zhao, *Adv. Funct. Mater.* , 2012, **22**, 5144-5156.
- [16] Q. Zhang, X. L. Wang, P. Z. Li, K. T. Nguyen, X. J. Wang, Z. Luo, H. C. Zhang, N. S. Tan, Y. L. Zhao, *Adv. Funct. Mater.* , 2014, **24**, 2450-2461.
- [17] N. Kamaly, Z. Y. Xiao, P. M. Valencia, A. F. Radovic-Moreno, O. C. Farokhzad, *Chem. Soc. Rev.* , 2012, **41**, 2971-3010.
